# Supplementary material for: Stepwise π-extension of meso-alkylidenyl porphyrins through sequential 1,3-dipolar cycloaddition and redox reactions
Source: Royal Society of Chemistry journal article supplement (doi:10.1039/c4cc04283b), 2014-01-01
Supplement: c4cc04283b1.pdf [file c4cc04283b1.pdf]

## Electronic Supplementary Information

# Stepwise $\pi$ -Extension of meso-Alkylidenyl Porphyrins through Sequential 1,3-Dipolar Cycloaddition and Redox Reactions

*Dowoo Park,<sup>a</sup> Seoung Doo Jeong,<sup>a</sup> Masatoshi Ishida<sup>b</sup> and Chang-Hee Lee<sup>\*,a</sup>*

*<sup>a</sup>Department of Chemistry Kangwon National University, Chun Cheon 200-701, Korea.*

*<sup>b</sup>Department of Chemistry Kyushu University, Hakozaki Higashiku, Fukuoka Japan.*

**General**

Proton NMR spectra (300 MHz, Bruker Avance<sup>TM</sup> and 400 MHz, Bruker DPX-400) were recorded using TMS as the internal standard. High resolution mass spectra were obtained on an Voyager-DE STR MALDITOF mass spectrometer. Column chromatography was performed over silica gel (Merck, 230-400 mesh). Pyrrole was distilled at atmospheric pressure from CaH<sub>2</sub>. All other reagents were obtained from Aldrich and used as received unless noted otherwise.

**Figure S1.**  $^1\text{H}$  NMR spectrum of compound (2) in  $\text{CDCl}_3$ .

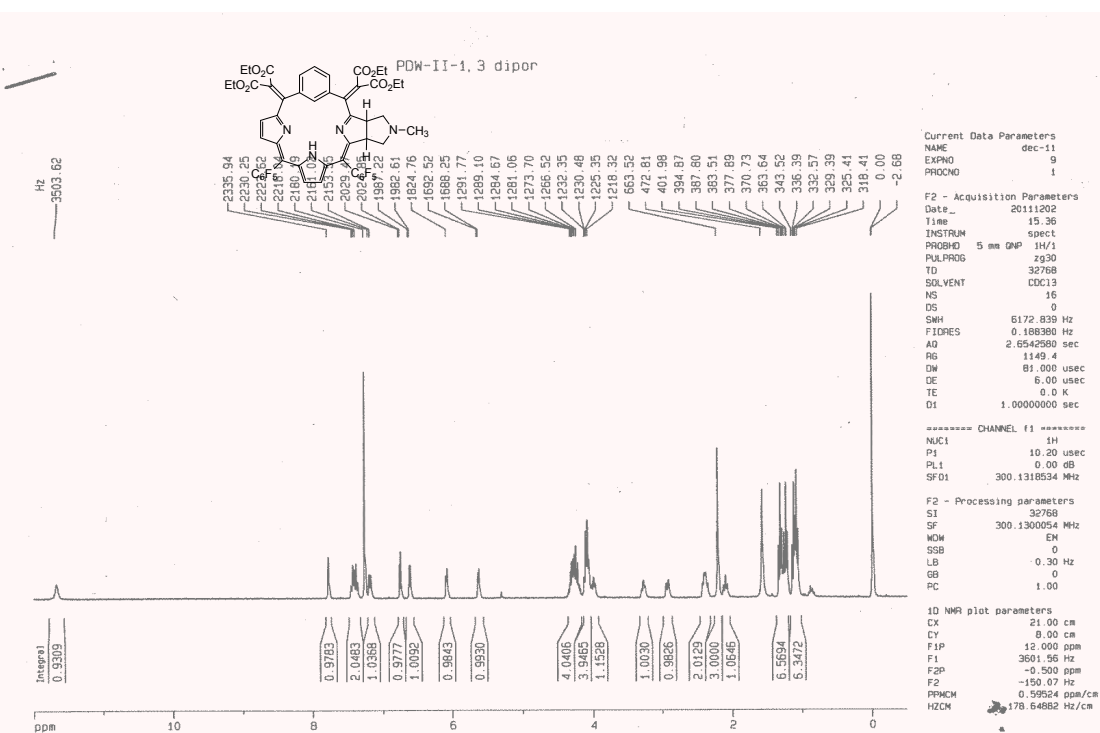

**Figure S2.**  $^{13}\text{C}$  NMR spectrum of compound (2) in  $\text{CDCl}_3$ .

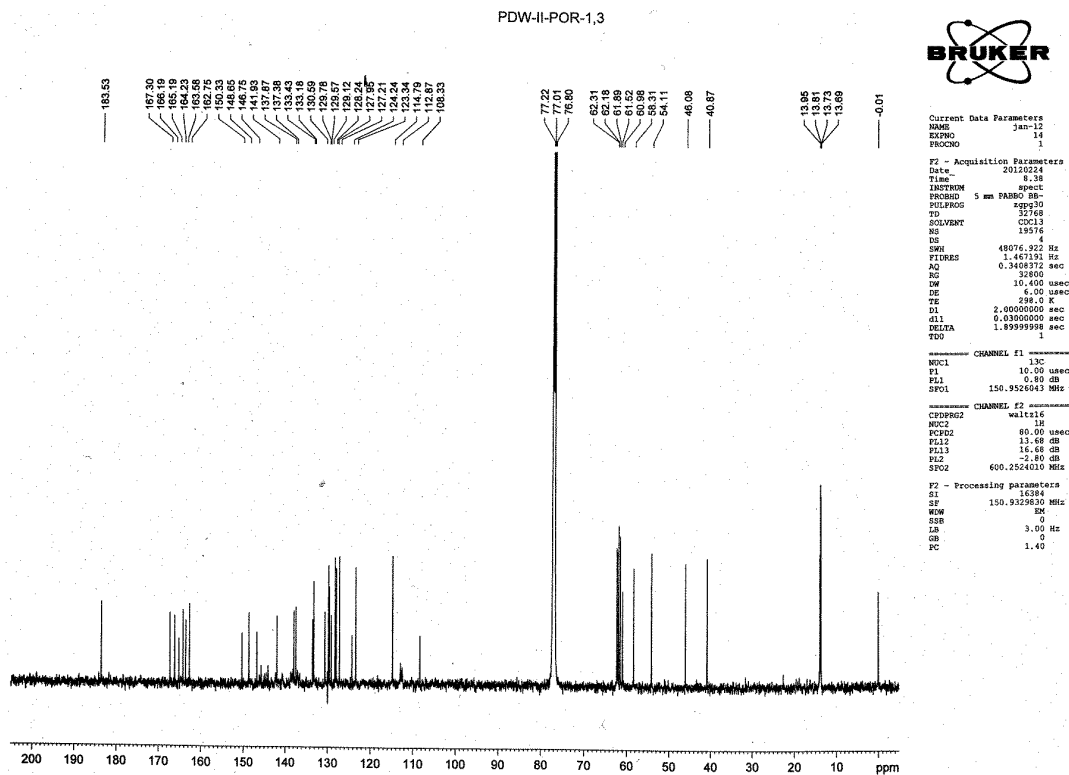

Figure S3. MALDI-TOF mass spectrum of compound (2).

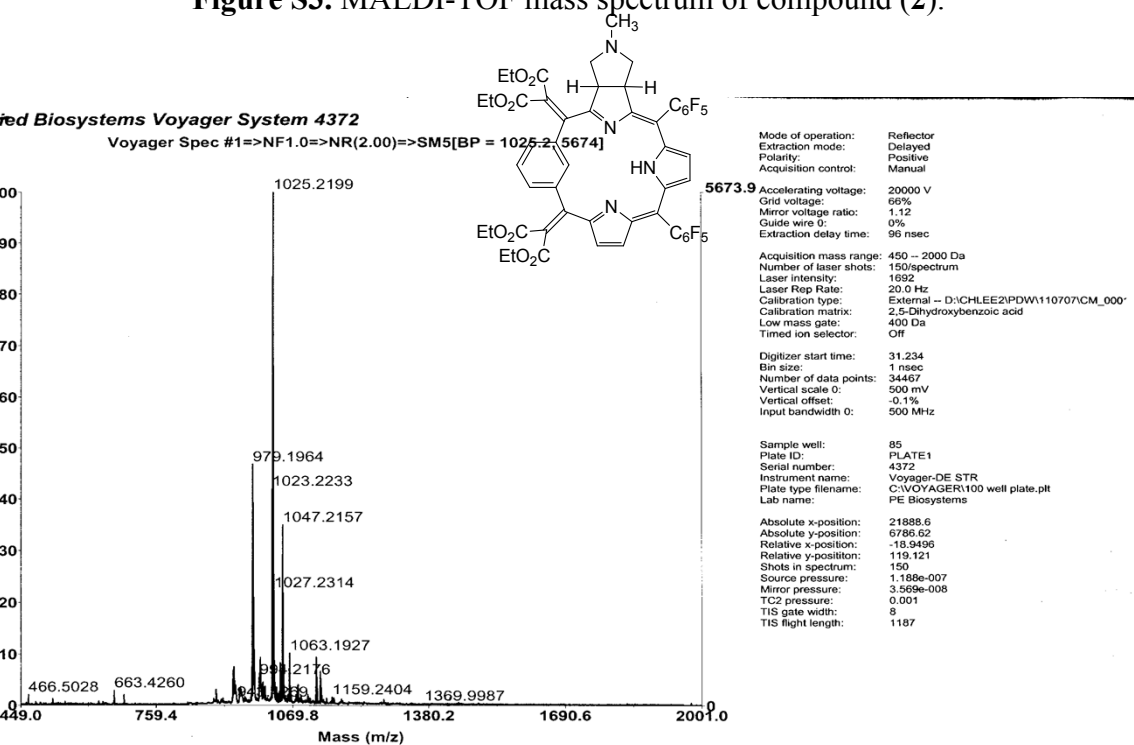

**Figure S5.** MALDI-TOF mass spectrum of compound (**3**)

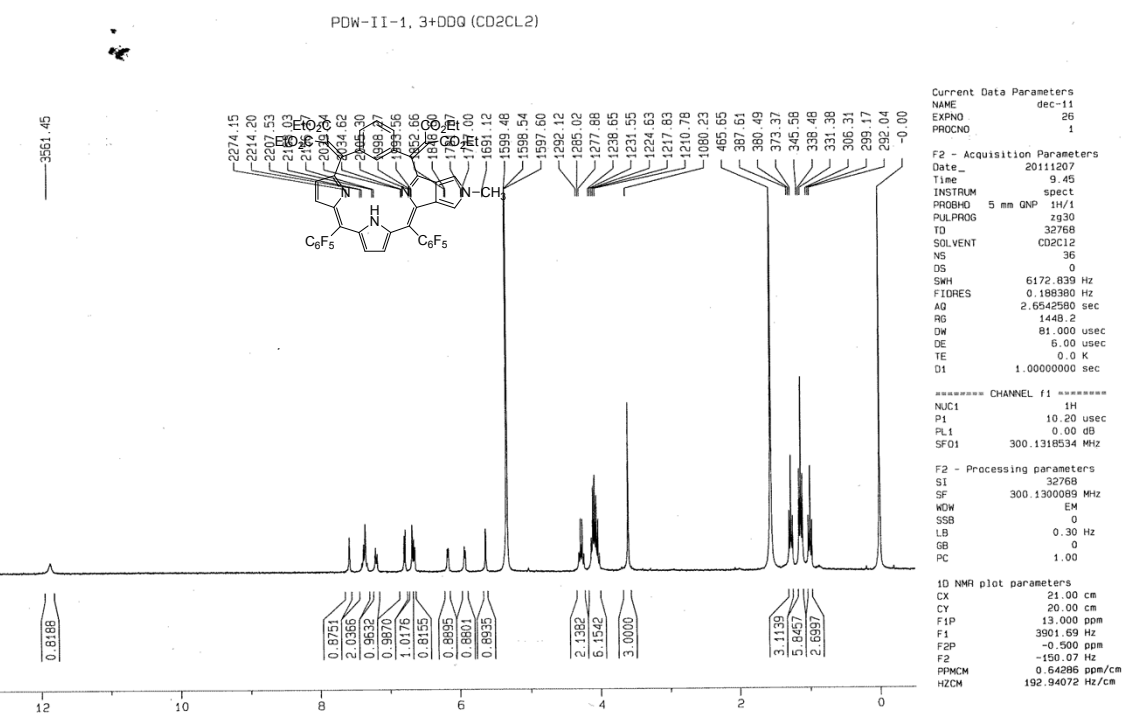

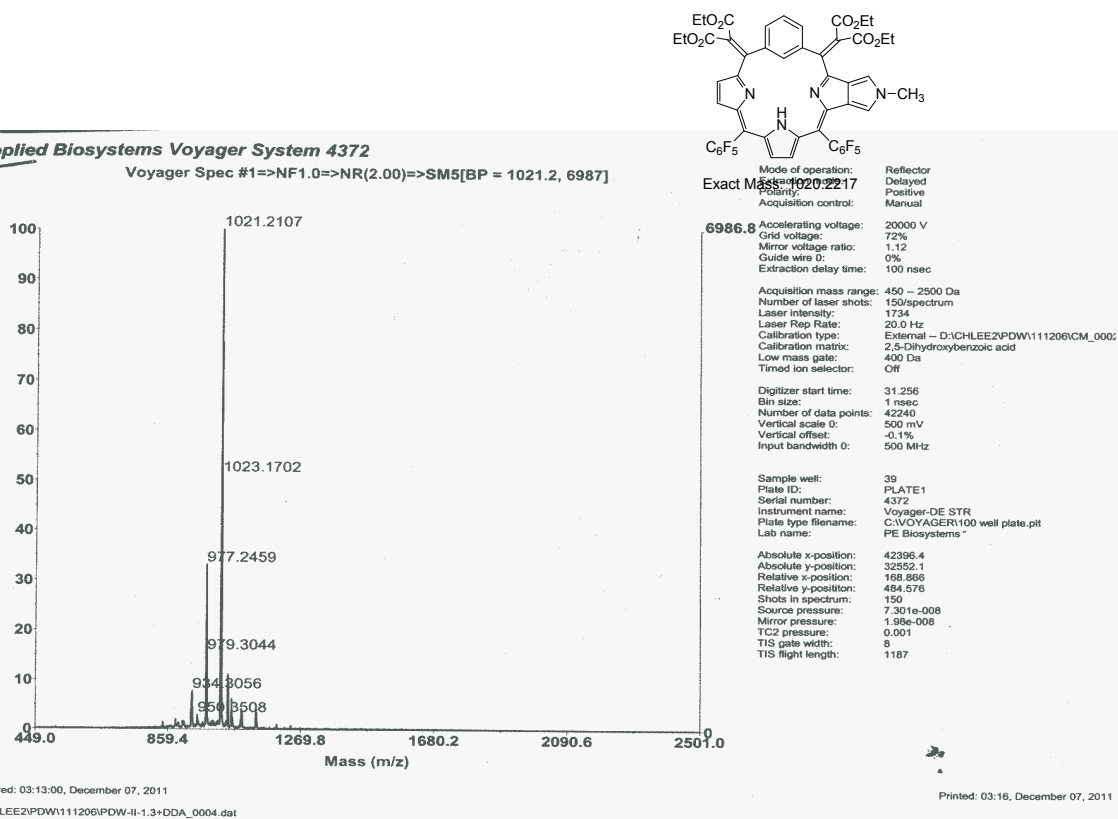

Figure S6.  $^1\text{H}$  NMR spectrum of compound (4) in  $\text{CDCl}_3$

PDW-II-102-PD-1

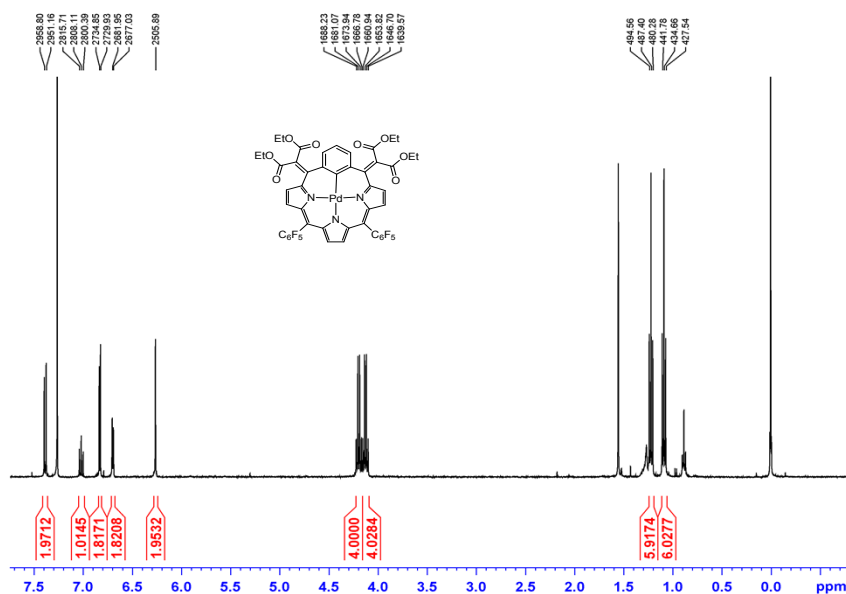

**Figure S7.**  $^{13}\text{C}$  NMR spectrum of compound (4) in  $\text{CDCl}_3$

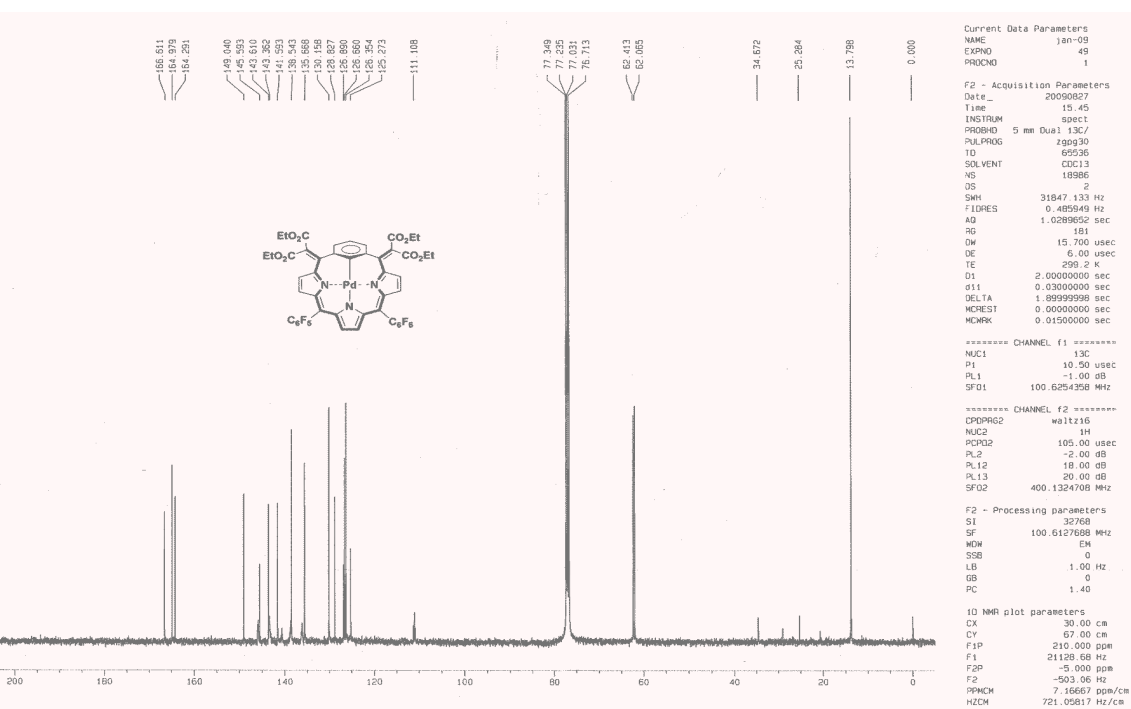

**Figure S8.** MALDI-TOF mass spectrum of compound (4).



Applied Biosystems Voyager System 4372

Voyager Spec #1=>NF1.0=>NR(2.00)[BP = 1094.1 12717]

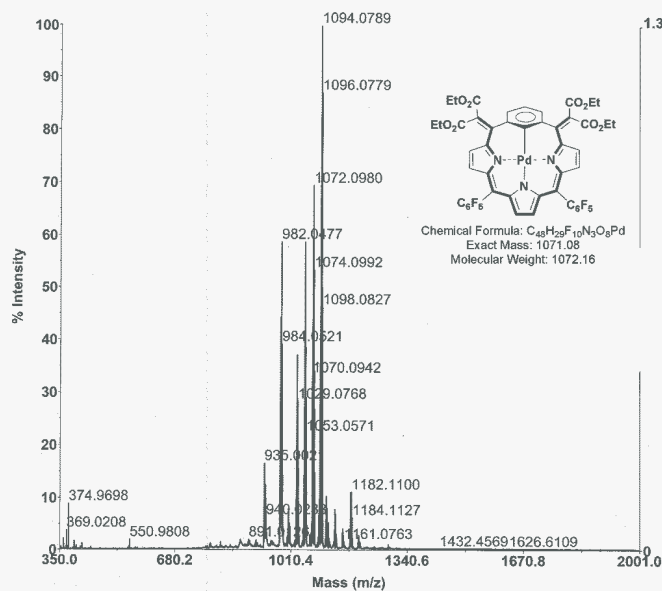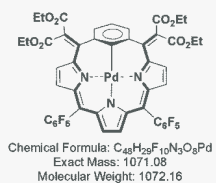

1.3E+4

Mode of operation: Reflector  
 Extraction mode: Delayed  
 Polarity: Positive  
 Acquisition control: Manual

Accelerating voltage: 20000 V  
 Grid voltage: 64%  
 Mirror voltage ratio: 1.12  
 Guide wire 0: 0.02%  
 Extraction delay time: 91 nsec

Acquisition mass range: 300 - 2000 Da  
 Number of laser shots: 200/spectrum  
 Laser intensity: 1668  
 Laser Rep Rate: 20.0 Hz  
 Calibration type: External - D:\CHLEE2\J...  
 Calibration matrix: 2,5-Dihydroxybenzoic acid  
 Low mass gate: 200 Da  
 Timed ion selector: Off

Digitizer start time: 25.522  
 Bin size: 1 nsec  
 Number of data points: 40164  
 Vertical scale 0: 500 mV  
 Vertical offset: 0%  
 Input bandwidth 0: 500 MHz

Sample well: 45  
 Plate ID: PLATE1  
 Serial number: 4372  
 Instrument name: Voyager-DE STR  
 Plate type filename: C:\VOYAGER\100 well plate.plt  
 Lab name: PE Biosystems

Absolute x-position: 21353.9  
 Absolute y-position: 28995.6  
 Relative x-position: -553.587  
 Relative y-position: 8.05372  
 Shots in spectrum: 200  
 Source pressure: 1.22e-007  
 Mirror pressure: 5.022e-008  
 TC2 pressure: 0.001  
 TIS gate width: 8  
 TIS flight length: 1187

Acquired: 04:55:00, August 27, 2009

Printed: 04:56, August 27, 2009

D:\CHLEE2\USD\090826\USD-II-20-3\_0002.dat

PDW-TT-99-1

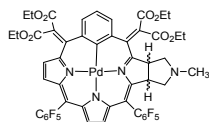

PCW-Monocyclo

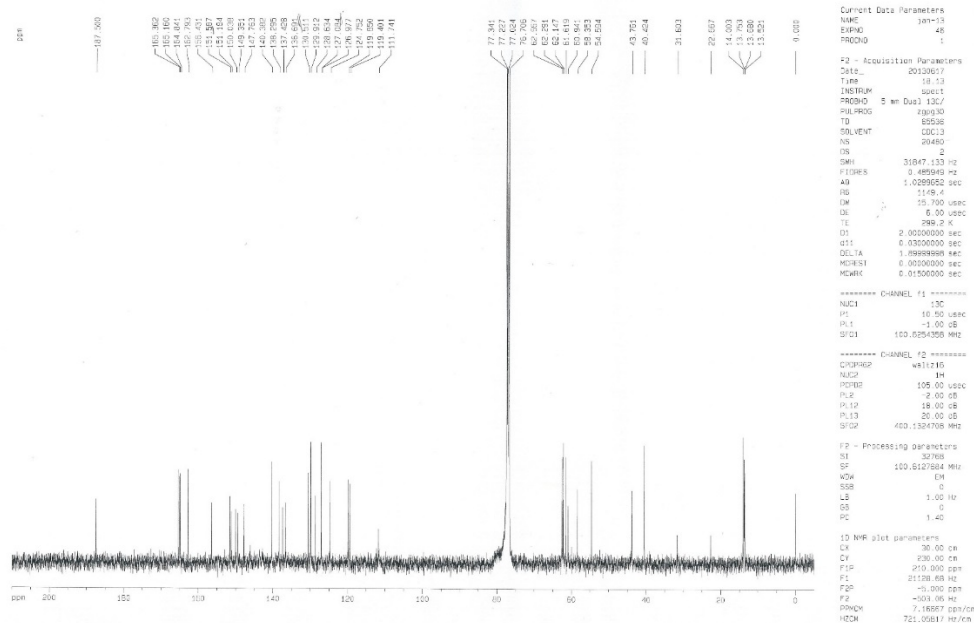

**Figure S11.** MALDI-TOF mass spectrum of compound (**5**)

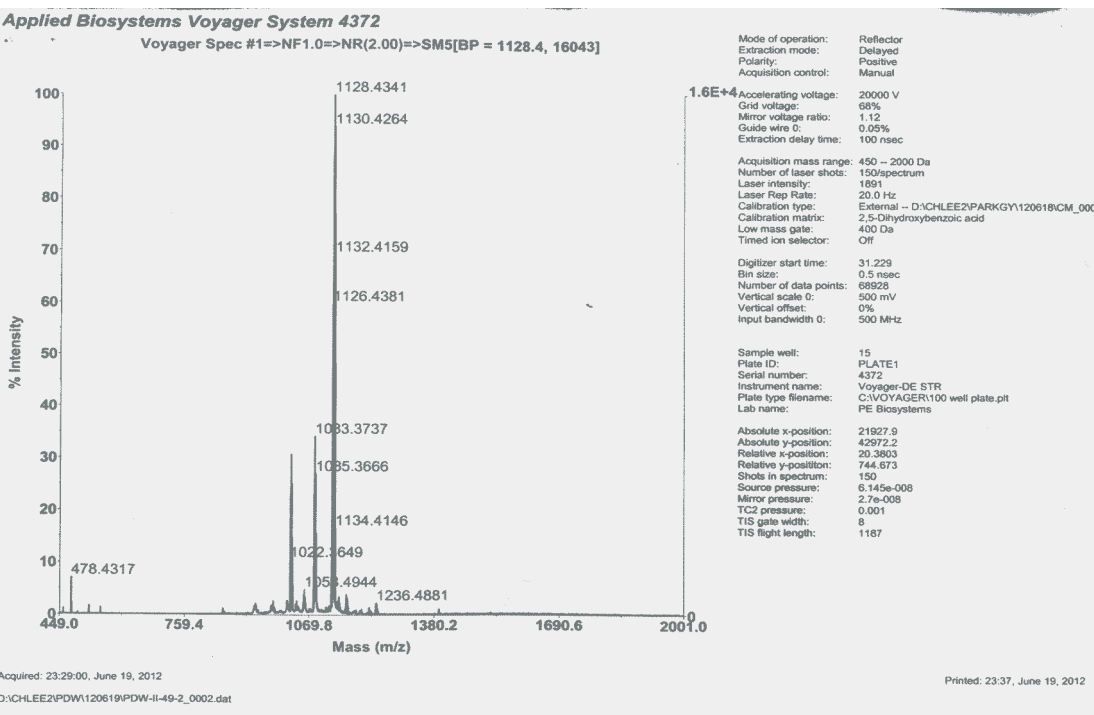

**Figure S12.**  $^1\text{H}$  NMR spectrum of compound (**6**) in  $\text{CDCl}_3$

PDW-II-103

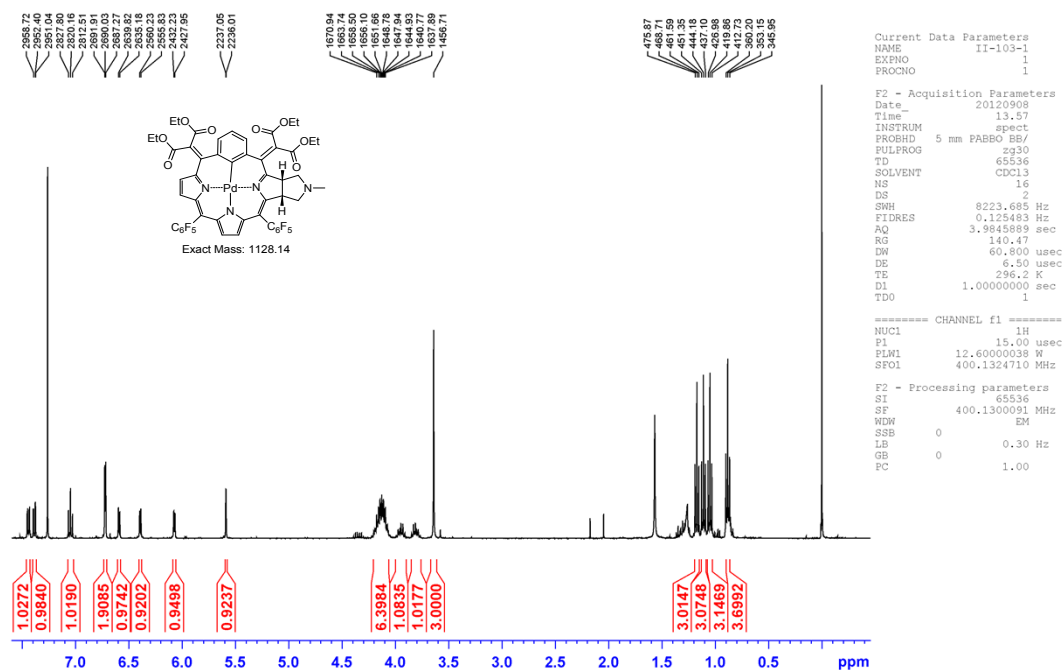

**Figure S13.** MALDI-TOF mass spectrum of compound (6)

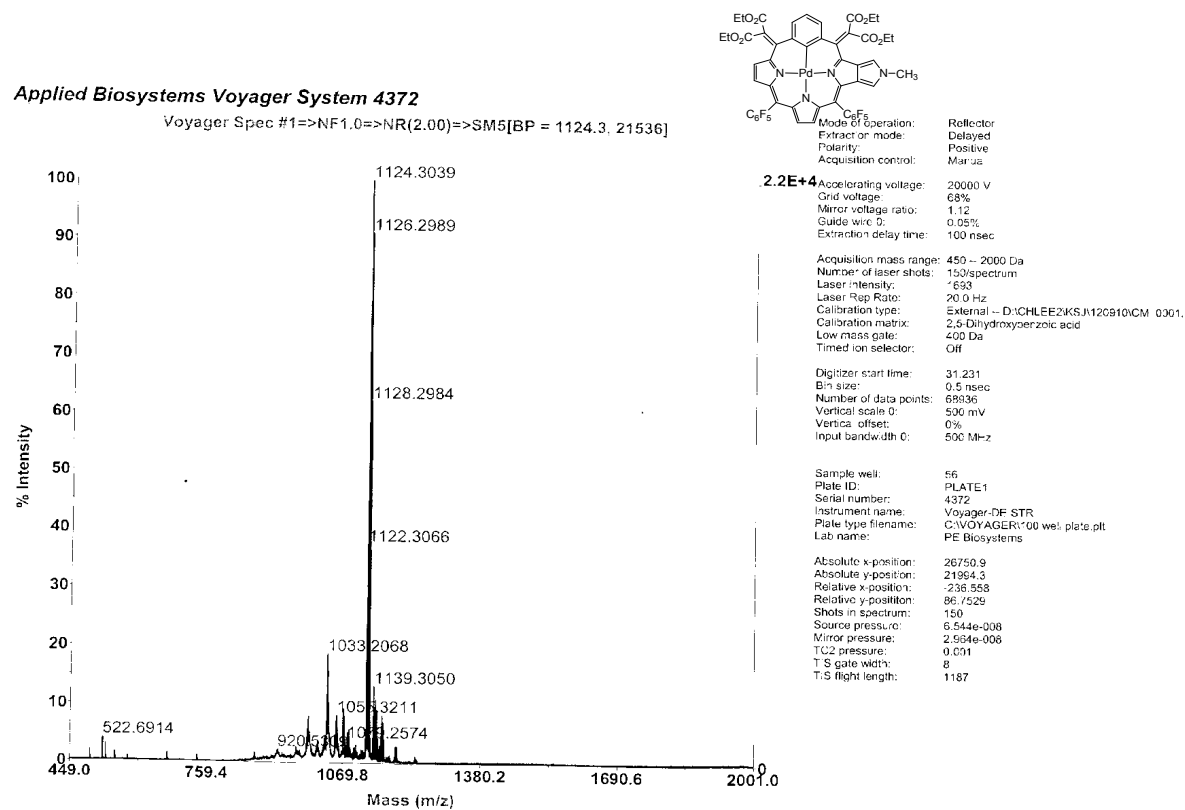

Acquired: 06:10:00, September 11, 2012  
 D:\CHI-EP2\K5J120910\PDW-200-1\_0001.dat

Printed: 06:14, September 11, 2012

**Figure S14.**  $^1\text{H}$  NMR spectrum of compound (7) in  $\text{CDCl}_3$ .



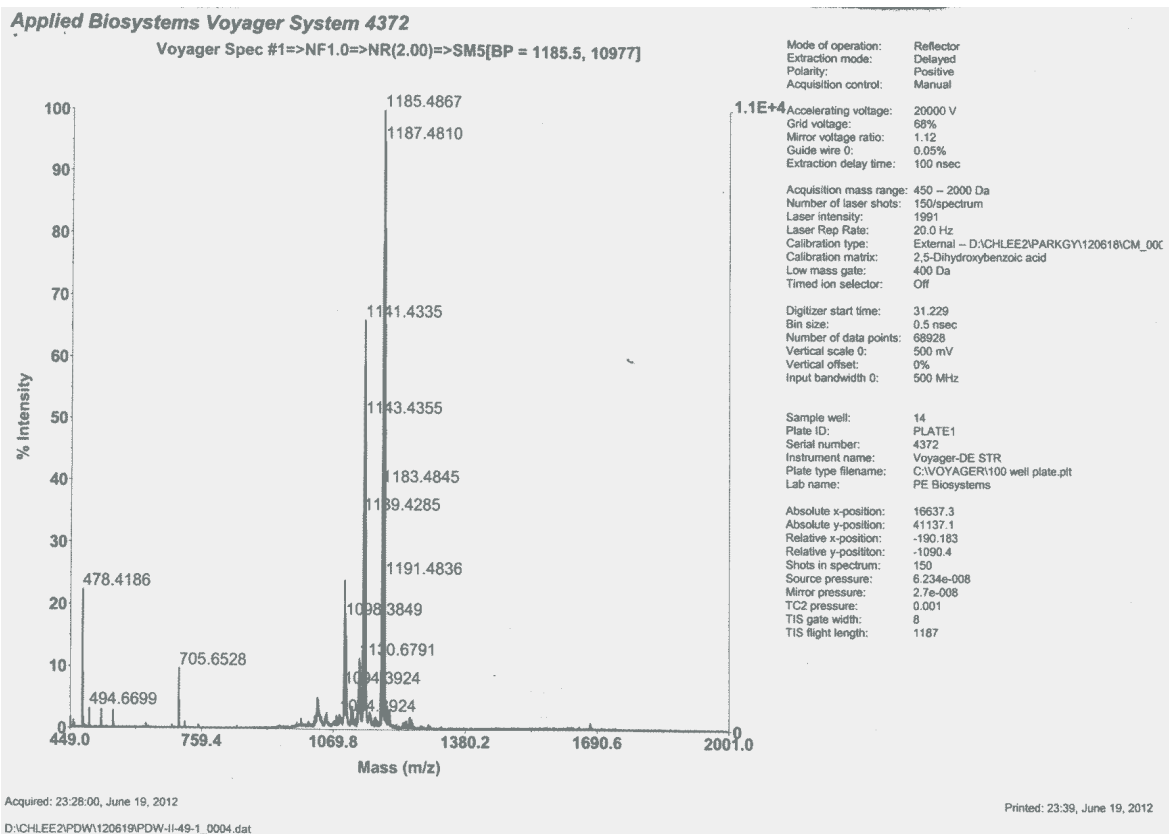

**Figure S17.**  $^1\text{H}$  NMR spectrum of compound (9) in  $\text{CDCl}_3$ .

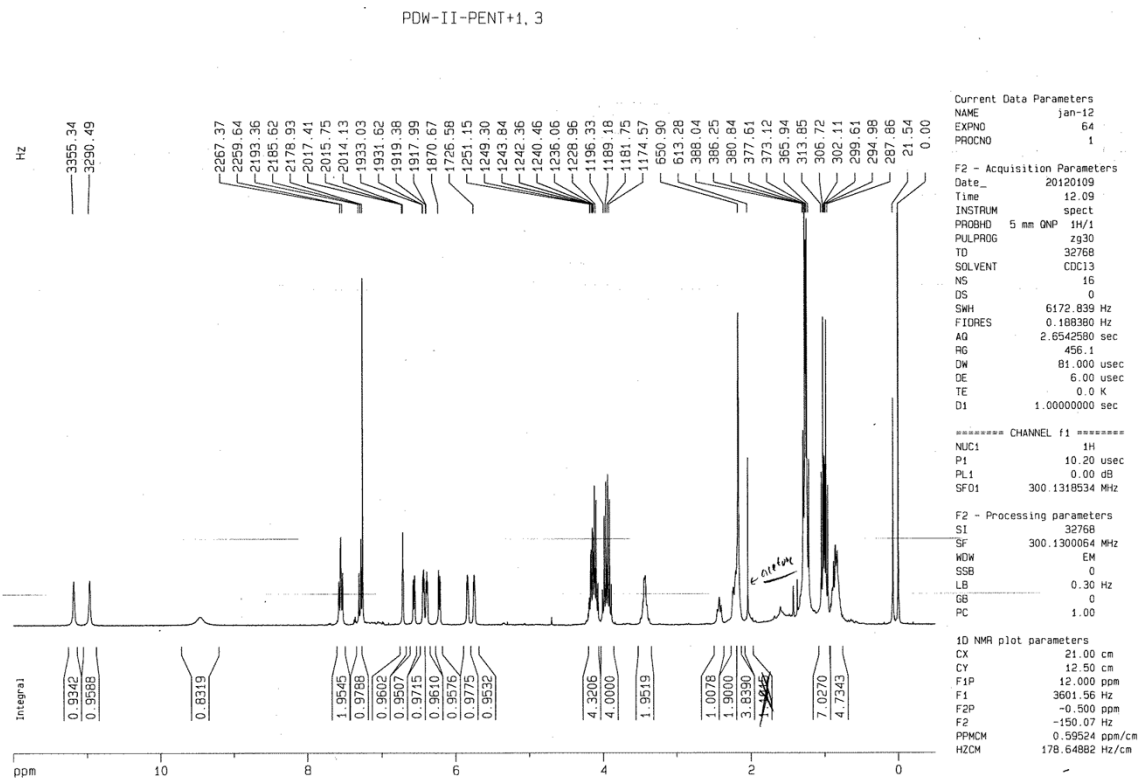

**Figure S18.**  $^{13}\text{C}$  NMR spectrum of compound (9) in  $\text{CDCl}_3$ .



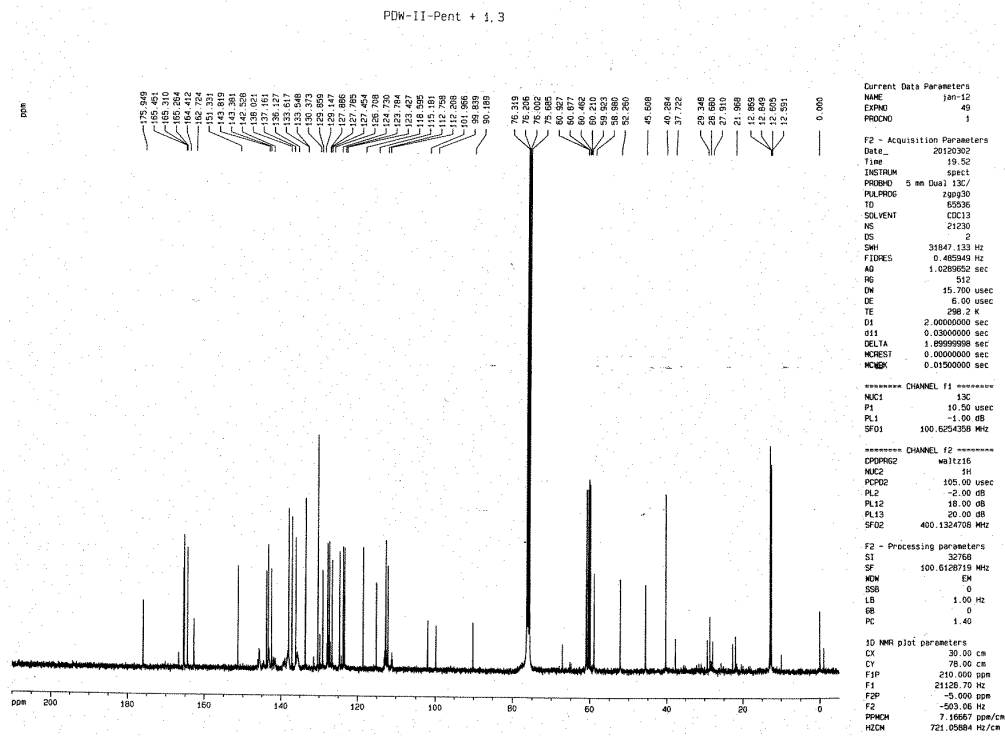

**Figure S19.** MALDI-TOF Mass spectrum of compound (9).

Applied Biosystems Voyager System 4372

Voyager Spec #1=>NF1.0=>NR(2.00)=>SM5[BP = 1270.0, 21256]

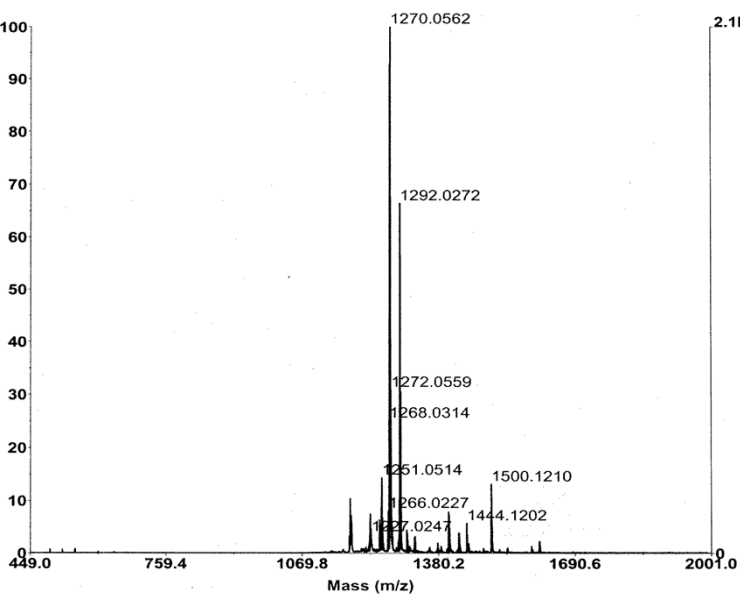

Mode of operation: Reflector  
Extraction mode: Delayed  
Polarity: Positive  
Acquisition control: Manual  
Accelerating voltage: 20000 V  
Grid voltage: 67%  
Mirror voltage ratio: 1.12  
Guide wire 0: 0.05%  
Extraction delay time: 100 nsec  
Acquisition mass range: 450 - 2000 Da  
Number of laser shots: 150/spectrum  
Laser intensity: 1797  
Laser Rep Rate: 20.0 Hz  
Calibration type: External - D:\CHLEE2\PDW\120109\CM\_000  
Calibration matrix: 2,5-Dihydroxybenzoic acid  
Low mass gate: 400 Da  
Timed ion selector: Off  
Digitizer start time: 31.2265  
Bin size: 0.5 nsec  
Number of data points: 68937  
Vertical scale 0: 500 mV  
Vertical offset: 0%  
Input bandwidth 0: 500 MHz  
Sample well: 32  
Plate ID: PLATE1  
Serial number: 4372  
Instrument name: Voyager-DE STR  
Plate type filename: C:\VOYAGER\100 well plate.plt  
Lab name: PE Biosystems  
Absolute x-position: 8607.64  
Absolute y-position: 32020  
Relative x-position: -59.8563  
Relative y-position: -47.4861  
Shots in spectrum: 150  
Source pressure: 7.526e-008  
Mirror pressure: 1.791e-008  
TC2 pressure: 0.001  
TIS gate width: 8  
TIS flight length: 1187

id: 07:09:00, January 10, 2012  
EE2\PDW\120109\PDW-II-PENT1.3\_0003.dat

Printed: 07:10, January 10, 2012

**Figure S20.**  $^1\text{H}$  NMR spectrum of spectrum of compound (10) in  $\text{CDCl}_3$ .

6754.93  
6648.25

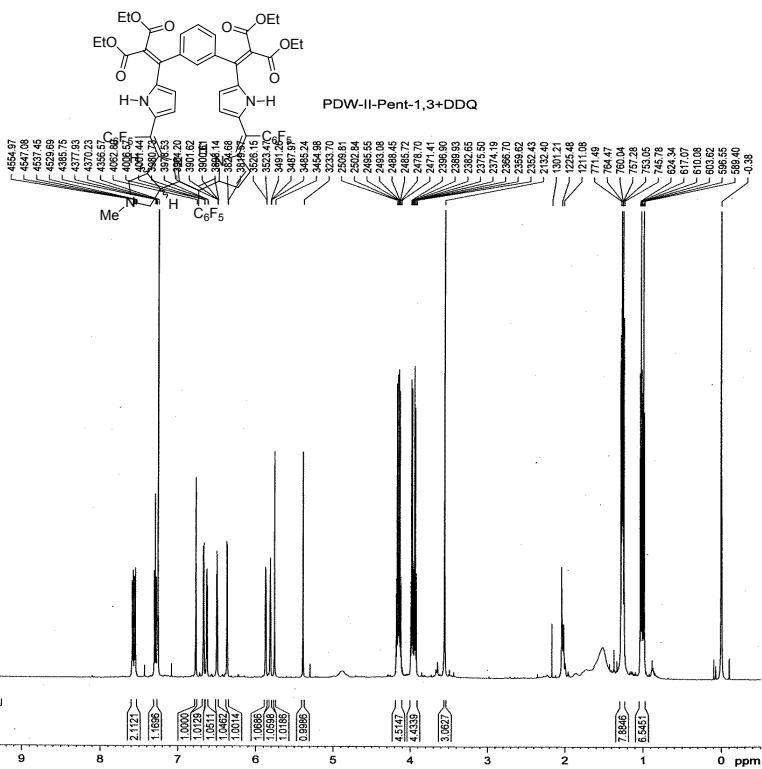

**Figure S21.**  $^{13}\text{C}$  NMR spectrum of spectrum of compound (**10**) in  $\text{CDCl}_3$ .

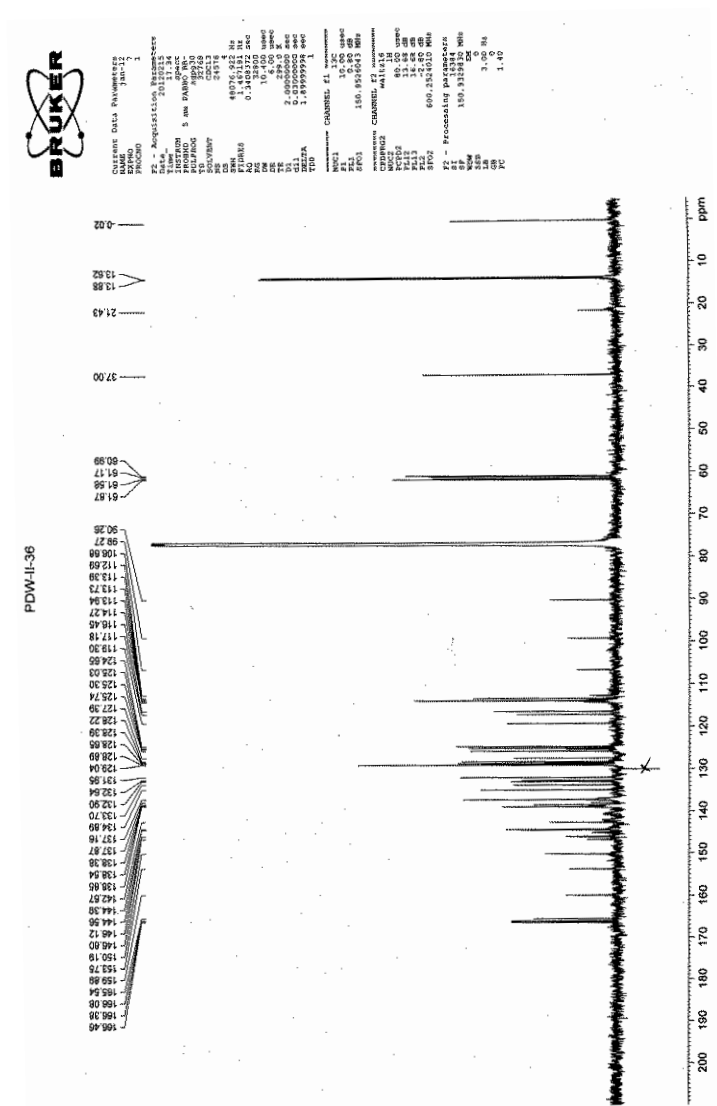

**Figure S22.** MALDI-TOF Mass spectrum of compound (10).

Applied Biosystems Voyager System 4372

Voyager Spec #1=>NF1.0=>NR(2.00)=>SM5(BP = 1266.2, 7867]

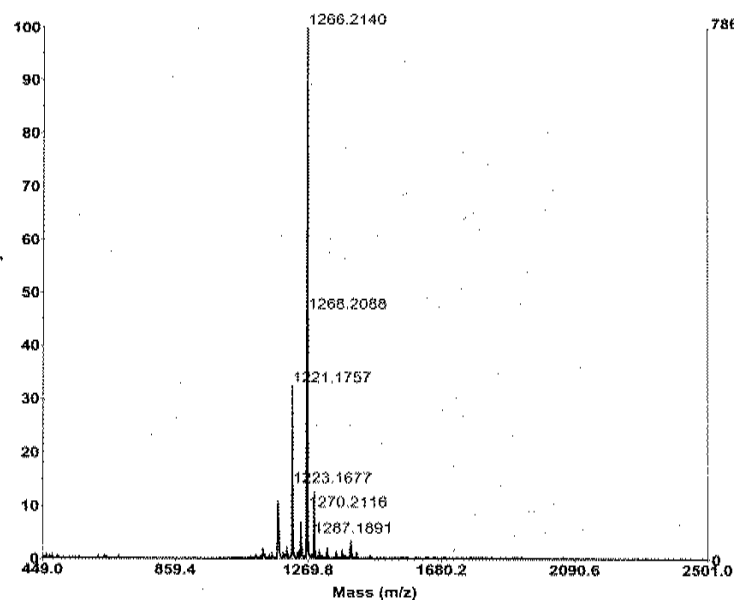

7867.2

|                         |                                         |
|-------------------------|-----------------------------------------|
| Mode of operation:      | Reflector                               |
| Extraction mode:        | Delayed                                 |
| Polarity:               | Positive                                |
| Acquisition control:    | Manual                                  |
| Accelerating voltage:   | 20000 V                                 |
| Grid voltage:           | 68%                                     |
| Minor voltage ratio:    | 1.12                                    |
| Guide wire Ø:           | 0.05%                                   |
| Extraction delay time:  | 95 nsec                                 |
| Acquisition mass range: | 450 - 2500 Da                           |
| Number of laser shots:  | 150/spectrum                            |
| Laser intensity:        | 1841                                    |
| Laser Rep Rate:         | 20.0 Hz                                 |
| Calibration type:       | External -- D:\CHLEE2\PDW\120221\CM_000 |
| Calibration matrix:     | 2,5-Dihydroxybenzoic acid               |
| Low mass gate:          | 400 Da                                  |
| Timed full selector:    | OFF                                     |
| Digilizer start time:   | 31.2305                                 |
| Shi size:               | 0.5 nsec                                |
| Number of data points:  | 84410                                   |
| Vertical scale 0:       | 500 mV                                  |
| Vertical offset:        | 0%                                      |
| Input bandwidth 0:      | 500 MHz                                 |
| Sample well:            | 75                                      |
| Plate ID:               | PLATE1                                  |
| Serial number:          | 4372                                    |
| Instrument name:        | Voyager-DE STR                          |
| Plate type (nonmo):     | C:\VOYAGER\100 well plate.pt            |
| Lab name:               | PE Biosystems                           |
| Absolute x-position:    | 21633.9                                 |
| Absolute y-position:    | 11504.5                                 |
| Relative x-position:    | -73.614                                 |
| Relative y-position:    | -153.002                                |
| Shots in spectrum:      | 150                                     |
| Source pressure:        | 1.122e-007                              |
| Mirror pressure:        | 1.945e-006                              |
| TO2 pressure:           | 0.001                                   |
| TIS gate width:         | 8                                       |
| TIS flight length:      | 1187                                    |

Printed: 07:14:00, February 22, 2012

CHLEE2\PDW\120221\PDW-1-PENT-1.3\DDQ\_0003.dat

Printed: 07:16, February 22, 2012

Figure S23.  $^1\text{H}$  NMR spectrum of compound (12) in  $\text{CDCl}_3$ .

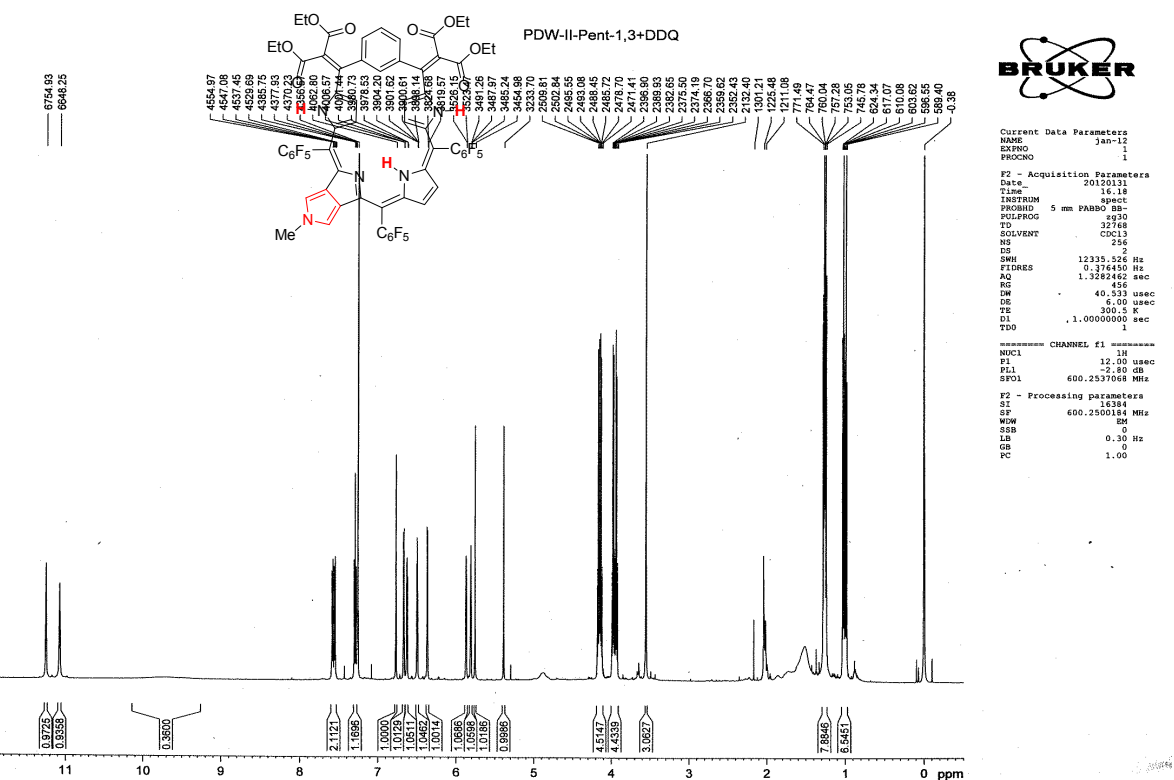

Figure S24.  $^{13}\text{C}$  NMR spectrum of compound (12) in  $\text{CDCl}_3$ .

PDW-II-Pent-1,3+DDQ

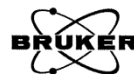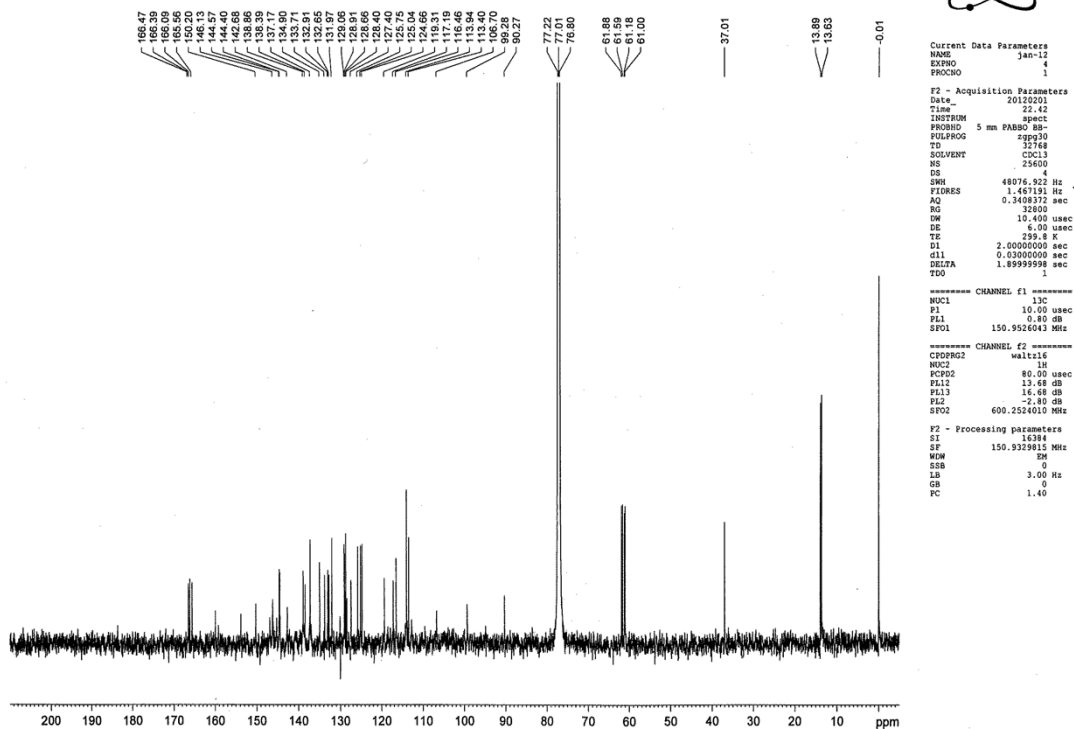

Figure S25. MALDI-TOF Mass spectrum of compound (12) in  $\text{CDCl}_3$ .

ed Biosystems Voyager System 4372

Voyager Spec #1=>NF1.0=>NR(2.00)=>SM5[BP = 1266.2, 7867]

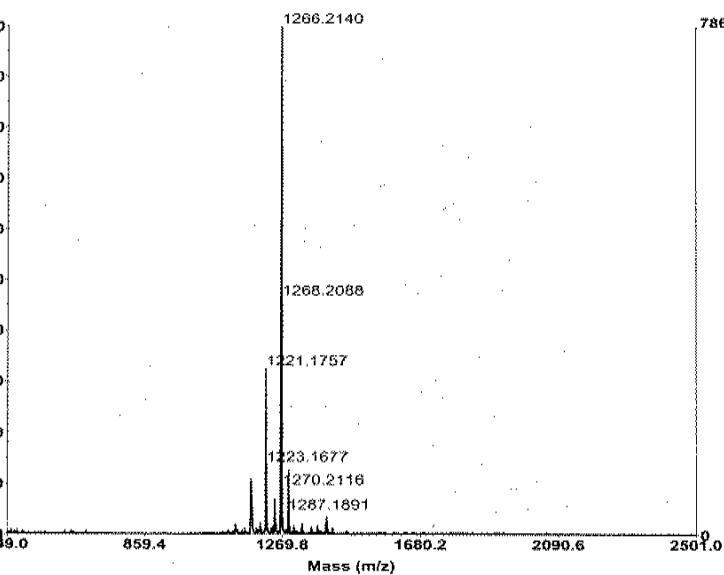

Mode of operation: Reflector  
Extraction mode: Delayed  
Polarity: Positive  
Acquisition control: Manual

Accelerating voltage: 20000 V  
Grid voltage: 68%  
Mirror voltage ratio: 1.12  
Guide wire 0: 0.05%  
Extraction delay time: 95 nsec

Acquisition mass range: 450 - 2500 Da  
Number of laser shots: 150/spectrum  
Laser intensity: 1841  
Laser Rep Rate: 20.0 Hz  
Calibration type: External - D:\CHLEE2\PDW\120221\CM\_000  
Calibration matrix: 2,5-Dihydroxybenzoic acid  
Low mass gate: 450 Da  
Timed ion selector: Off

Digitizer start time: 31.2305  
Bin size: 0.5 nsec  
Number of data points: 84410  
Vertical scale 0: 500 mV  
Vertical offset: 0%  
Input bandwidth 0: 500 MHz

Sample well: 75  
Plate ID: PLATE1  
Serial number: 4372  
Instrument name: Voyager-DE STR  
Plate type filename: C:\VOYAGER\100 well plate.pt  
Lab name: PE Biosystems

Absolute x-position: 21633.9  
Absolute y-position: 11594.6  
Relative x-position: -73.614  
Relative y-position: -153.002  
Shots in spectrum: 150  
Source pressure: 1.122e-007  
Mirror pressure: 1.943e-006  
TIC2 pressure: 0.001  
TIS gate width: 8  
TIS Right length: 1167

7:14:00, February 22, 2012

C:\VW\120221\PDW-1\PE\1.3+ODQ\_0003.dsr

Printed: 07:16, February 22, 2012

Figure S26.  $^1\text{H}$  NMR spectrum of compound (13) in  $\text{CDCl}_3$ .



PDW-II-PENT-1,3+DDQ+1,3

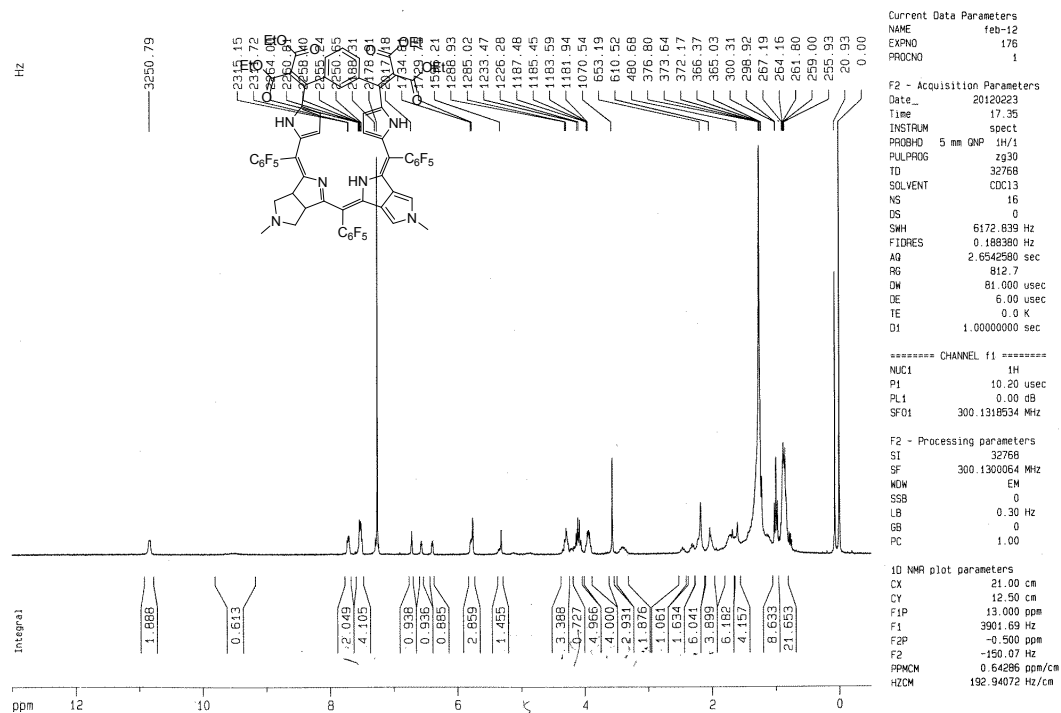

Figure S27. MALDI-TOF Mass spectrum of compound (13).

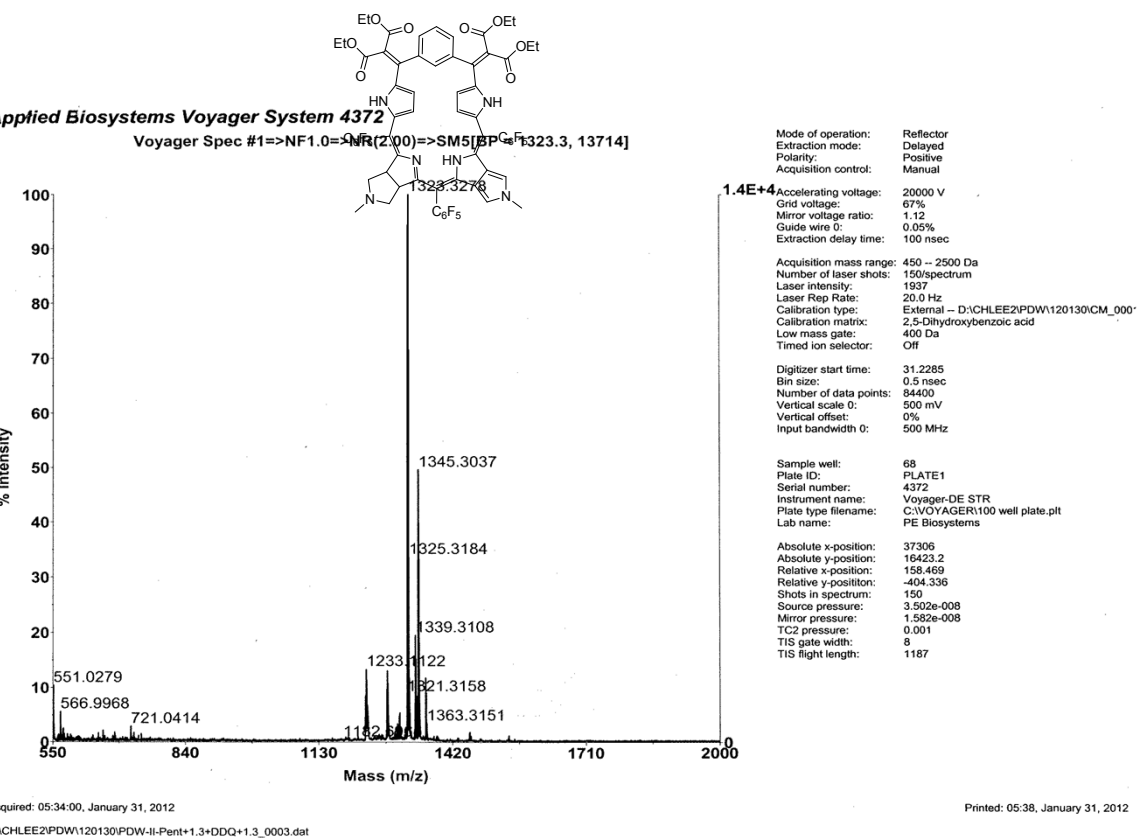

**Figure S28.**  $^1\text{H}$  NMR spectrum of 6,26-Bis(diethoxycarbonylmethylidene)-11,16,21-di(pentafluorophenyl)-12,13[c]-(*N*-methylpyrrole)-18,19[c]-(*N*-methylpyrrole)-(m-benzi)pentaphyrin (**14**) in  $\text{CDCl}_3$ .

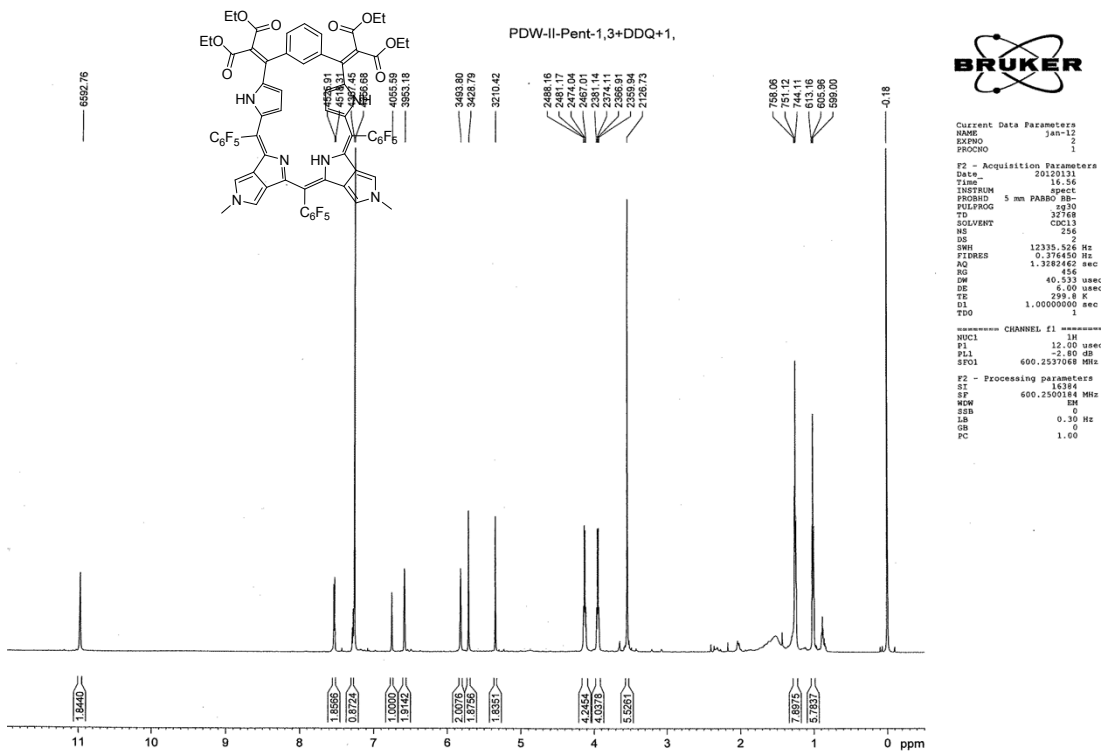

**Figure S29.**  $^{13}\text{C}$  NMR spectrum of 6,26-Bis(diethoxycarbonylmethylidene)-11,16,21-di(pentafluorophenyl)-12,13[c]-(N-methylpyrrole)-18,19[c]-(N-methylpyrrole)-(m-benzi)pentaphyrin (**14**) in  $\text{CDCl}_3$ .

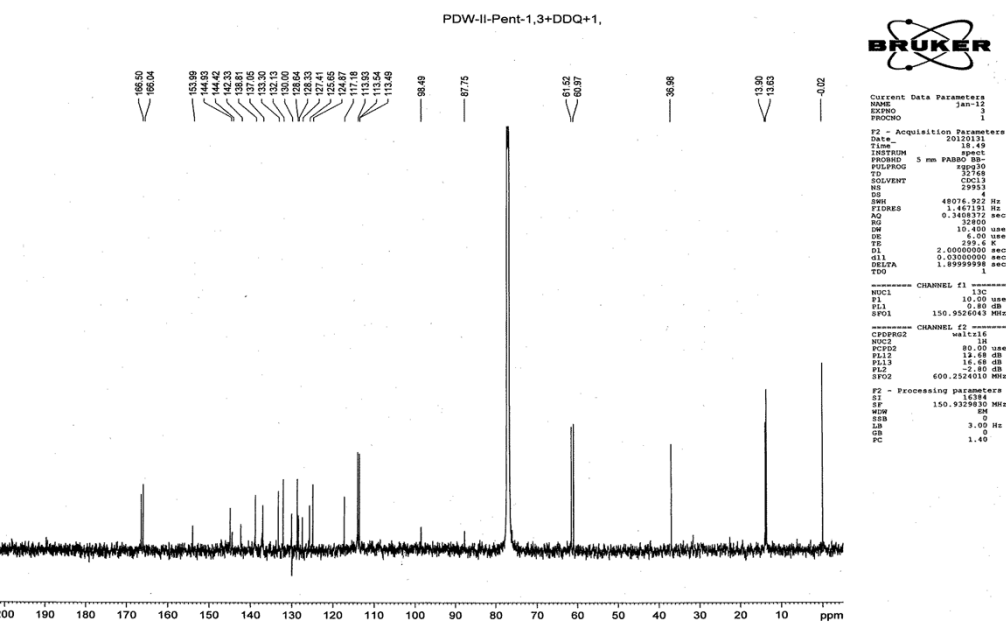

**Figure S30.** MALDI-TOF Mass of 6,26-Bis(diethoxycarbonylmethylidene)-11,16,21-di(pentafluorophenyl)-12,13[c]-(*N*-methylpyrrole)-18,19[c]-(*N*-methylpyrrole)-(*m*-benzi)pentaphyrin (**14**).

Biosystems Voyager System 4372

Voyager Spec #1=>NF1.0=>NR(2.00)=>SM5[BP = 1318.3, 8777]

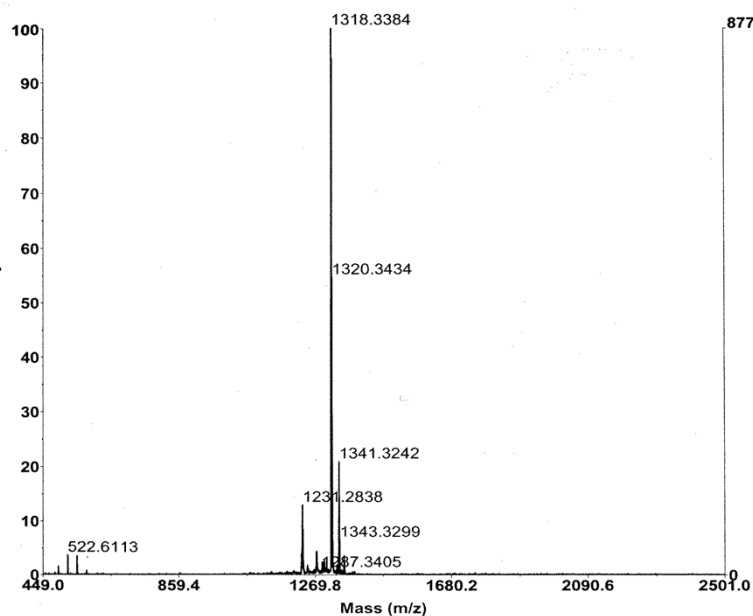

8776.9

|                         |                                         |
|-------------------------|-----------------------------------------|
| Mode of operation:      | Reflector                               |
| Extraction mode:        | Delayed                                 |
| Polarity:               | Positive                                |
| Acquisition control:    | Manual                                  |
| Accelerating voltage:   | 20000 V                                 |
| Grid voltage:           | 67%                                     |
| Mirror voltage ratio:   | 1.12                                    |
| Guide wire Ø:           | 0.05%                                   |
| Extraction delay time:  | 100 nsec                                |
| Acquisition mass range: | 450 -- 2500 Da                          |
| Number of laser shots:  | 150/spectrum                            |
| Laser intensity:        | 1663                                    |
| Laser Rep Rate:         | 20.0 Hz                                 |
| Calibration type:       | External -- D:\CHLEE2\PDW\120131\CM_000 |
| Calibration matrix:     | 2,5-Dihydroxybenzoic acid               |
| Low mass gate:          | 400 Da                                  |
| Timed ion selector:     | Off                                     |
| Digitizer start time:   | 31.2275                                 |
| Bin size:               | 0.5 nsec                                |
| Number of data points:  | 84403                                   |
| Vertical scale Ø:       | 500 mV                                  |
| Vertical offset:        | 0%                                      |
| Input bandwidth Ø:      | 500 MHz                                 |
| Sample well:            | 74                                      |
| Plate ID:               | PLATE1                                  |
| Serial number:          | 4372                                    |
| Instrument name:        | Voyager-DE STR                          |
| Plate type filename:    | C:\VOYAGER\100 well plate.plt           |
| Lab name:               | PE Biosystems                           |
| Absolute x-position:    | 16505.7                                 |
| Absolute y-position:    | 11322                                   |
| Relative x-position:    | -321.81                                 |
| Relative y-position:    | -425.507                                |
| Shots in spectrum:      | 150                                     |
| Source pressure:        | 1.075e-007                              |
| Mirror pressure:        | 1.855e-008                              |
| TC2 pressure:           | 0.001                                   |
| TIS gate width:         | 8                                       |
| TIS flight length:      | 1187                                    |

Printed: 07:34:00, February 01, 2012

Printed: 07:38, February 01, 2012

CHLEE2\PDW\120131\PDW-II-PENT1.3+DDQ+1.3+DDQ\_0001.dat
